# Supplementary material
Source: PubMed Central journal article supplement (PMC6780666)
Supplement: ajcr0009-1938-f7.pdf [file ajcr0009-1938-f7.pdf]

# MYCN affects the chemoresistance of SCLC by binding the HES1 promoter

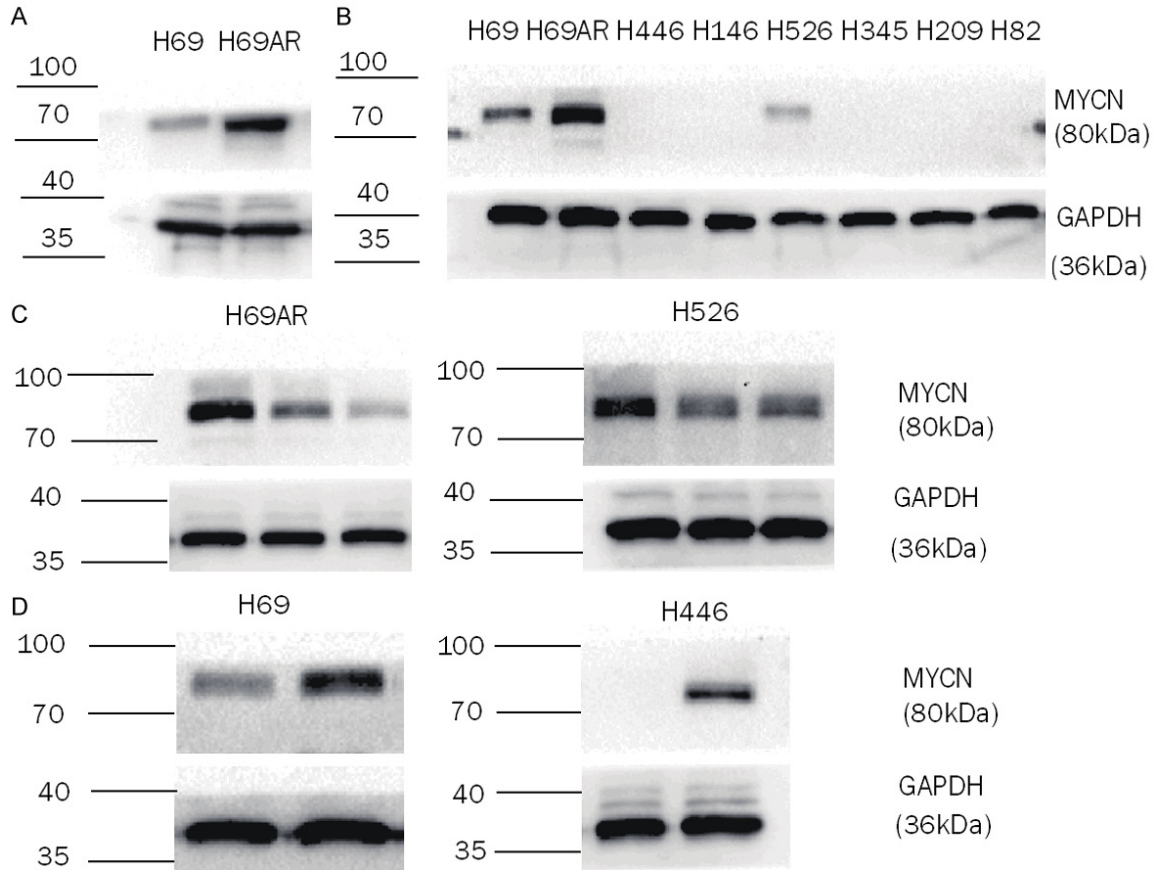

**Figure S1.** The uncropped Western blots of **Figure 1**. A. Western blot analysis of MYCN expression in H69 and H69AR cells. B. Western blot analysis of MYCN expression in eight SCLC cell lines (H69, H69AR, H446, H146, H526, H345, H209, and H82). C. Western blot analyses of MYCN expression in H69AR and H526 cells transfected with siRNA targeting MYCN or NC siRNA. D. Western blot analyses of MYCN expression in H69 and H446 cells transfected with pcDNA3.1-MYCN or NC plasmids.

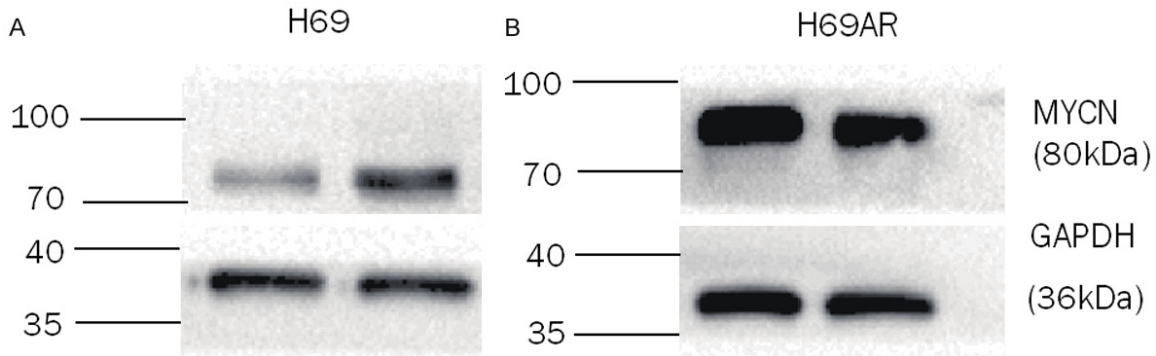

**Figure S2.** The uncropped Western blots of **Figure 2**. A. Western blot analysis of MYCN expression in H69 cells transfected with lentiviral-based MYCN overexpression plasmids and their corresponding control vectors. B. Western blot analysis of MYCN expression in H69AR cells transfected with lentiviral-based MYCN knockdown plasmids and their corresponding control vectors.

MYCN affects the chemoresistance of SCLC by binding the HES1 promoter

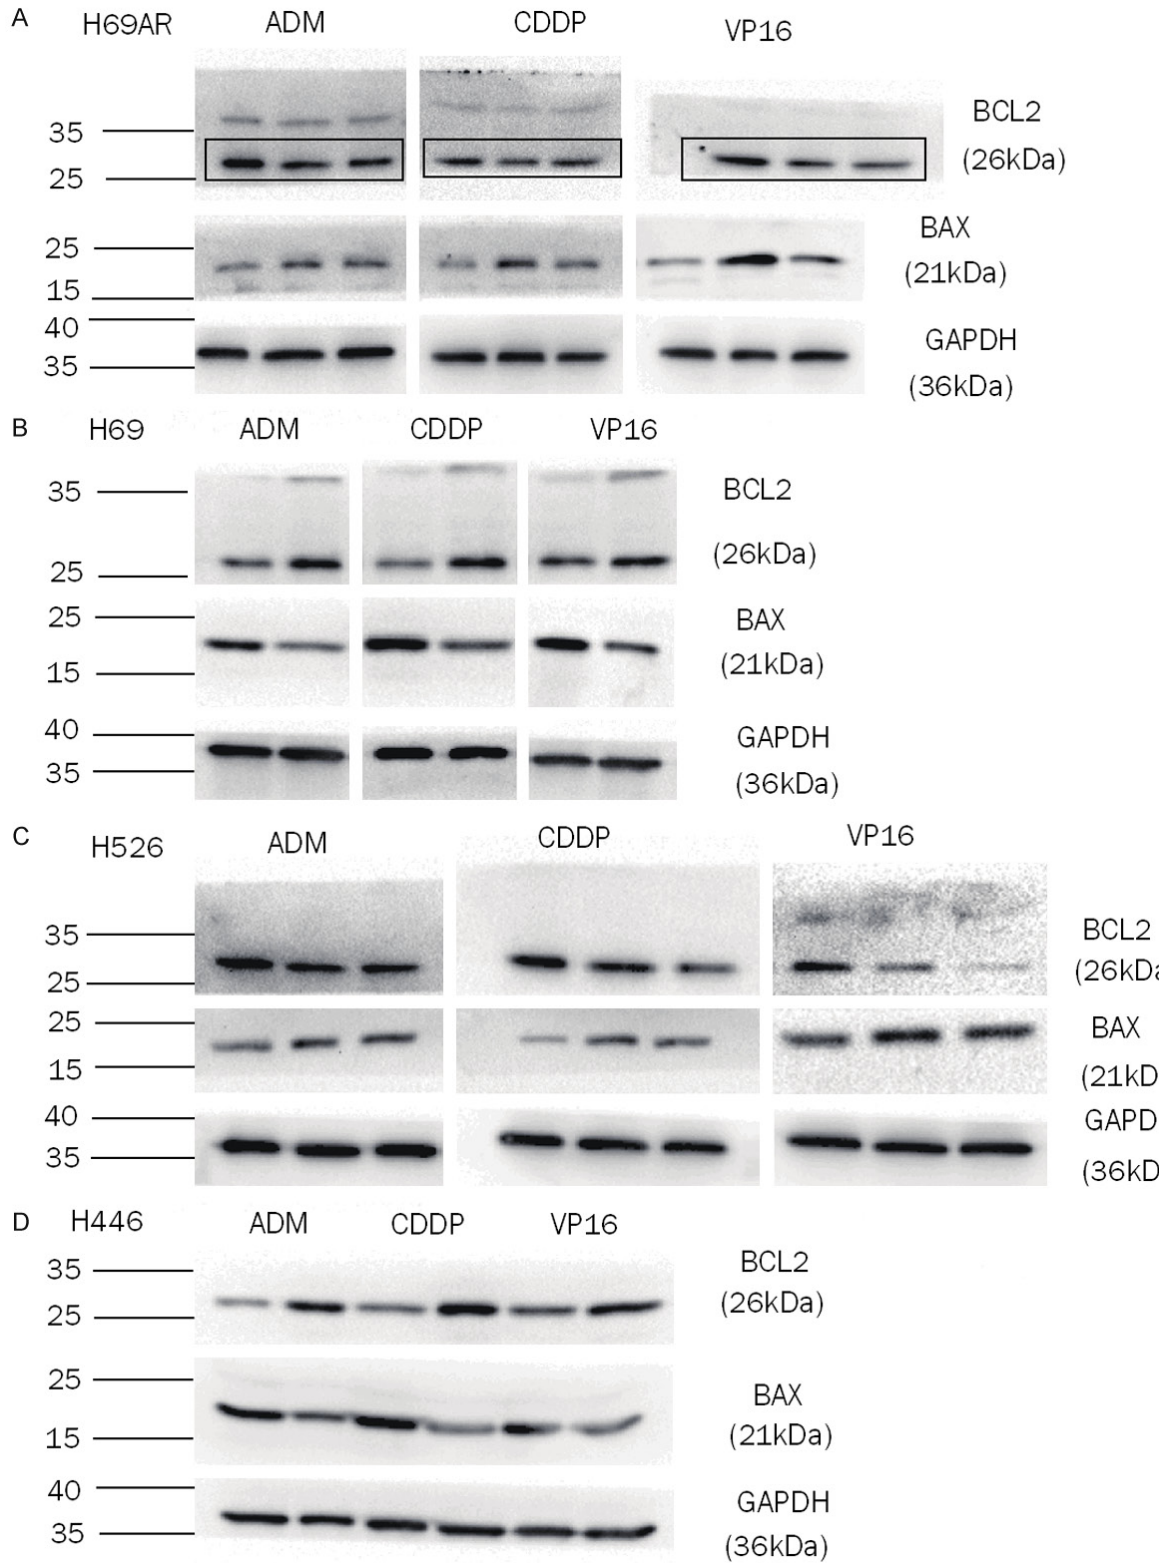

**Figure S3.** The uncropped Western blots of **Figure 3**. A, C. Apoptosis-related proteins (BCL2 and BAX) were measured by Western blot in MYCN-downregulated H69AR and H526 SCLC cells after exposure to anticancer drugs for 24 h. B, D. Apoptosis-related proteins (BCL2 and BAX) were measured by Western blot in MYCN-upregulated H69 and H446 SCLC cells after exposure to anticancer drugs for 24 h.

MYCN affects the chemoresistance of SCLC by binding the HES1 promoter

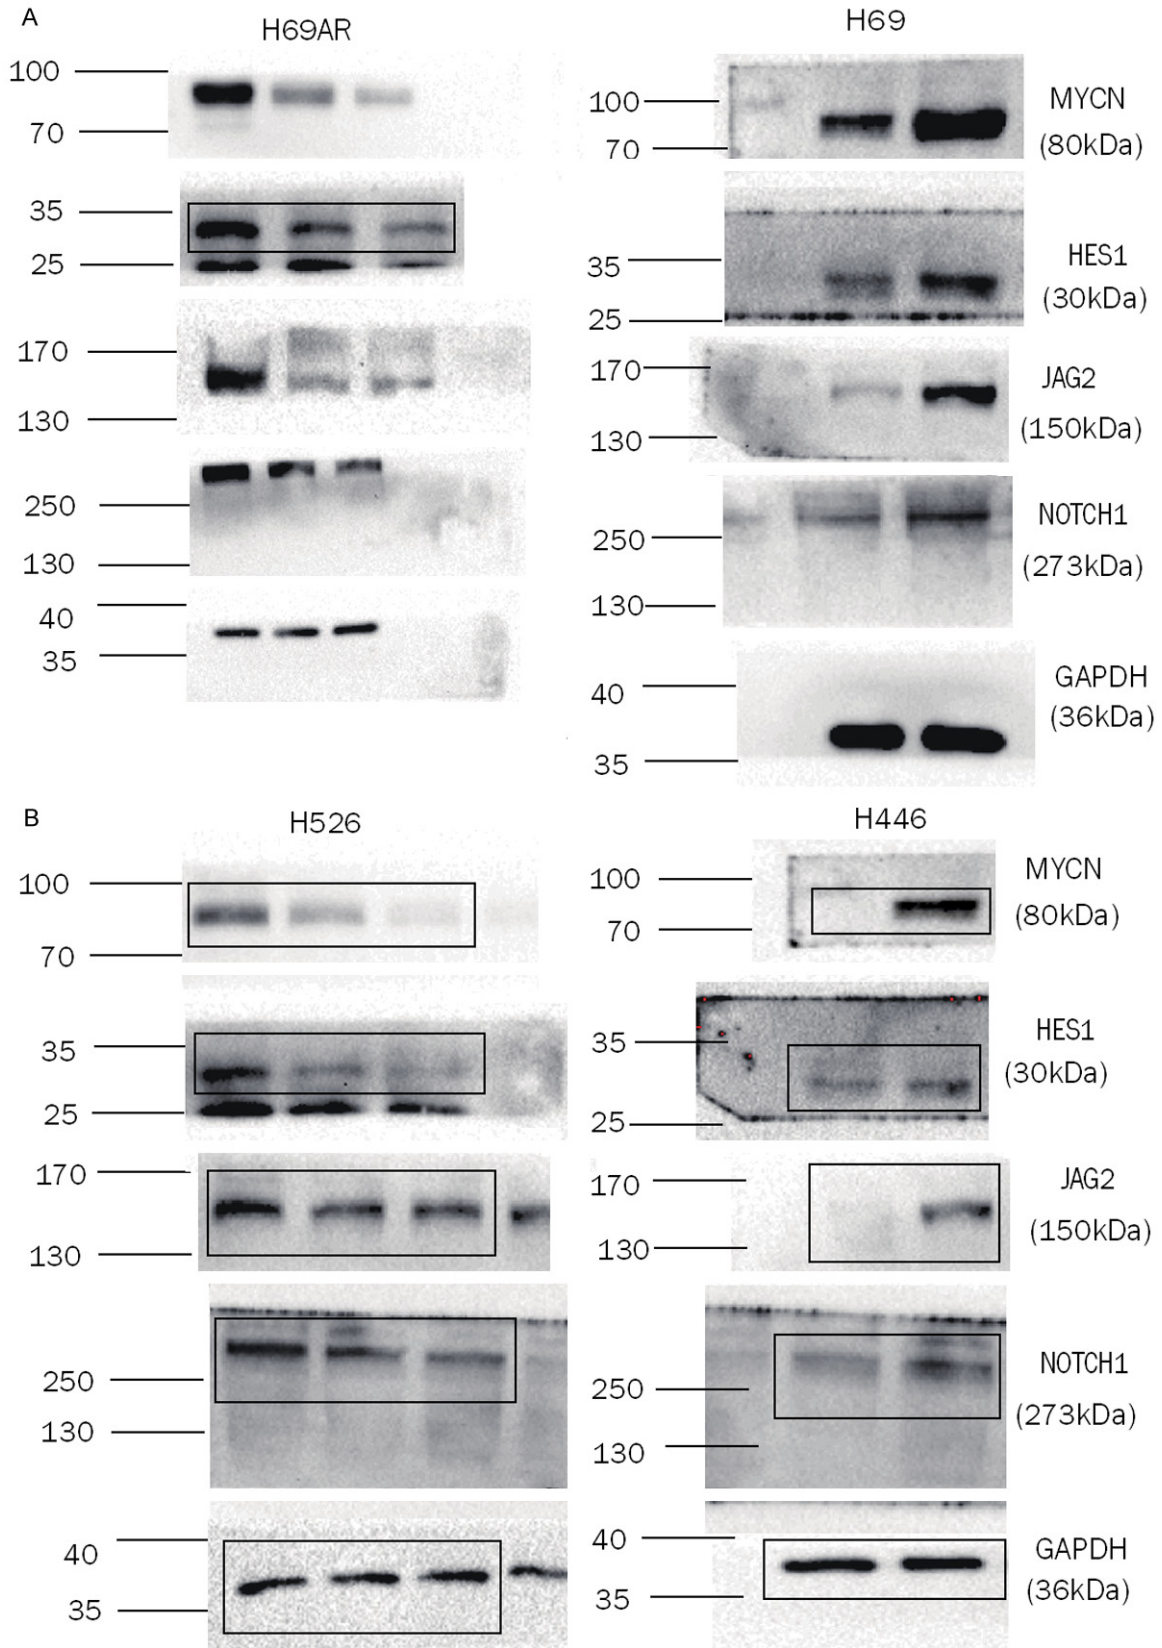

**Figure S4.** The uncropped Western blots of Figure 4. A. Western blot analysis of MYCN, HES1, JAG2, and NOTCH1 expression in MYCN-downregulated H69AR or MYCN-upregulated H69 SCLC cells. B. Western blot analysis of MYCN, HES1, JAG2, and NOTCH1 expression in MYCN-downregulated H526 or MYCN-upregulated H446 SCLC cells.

MYCN affects the chemoresistance of SCLC by binding the HES1 promoter

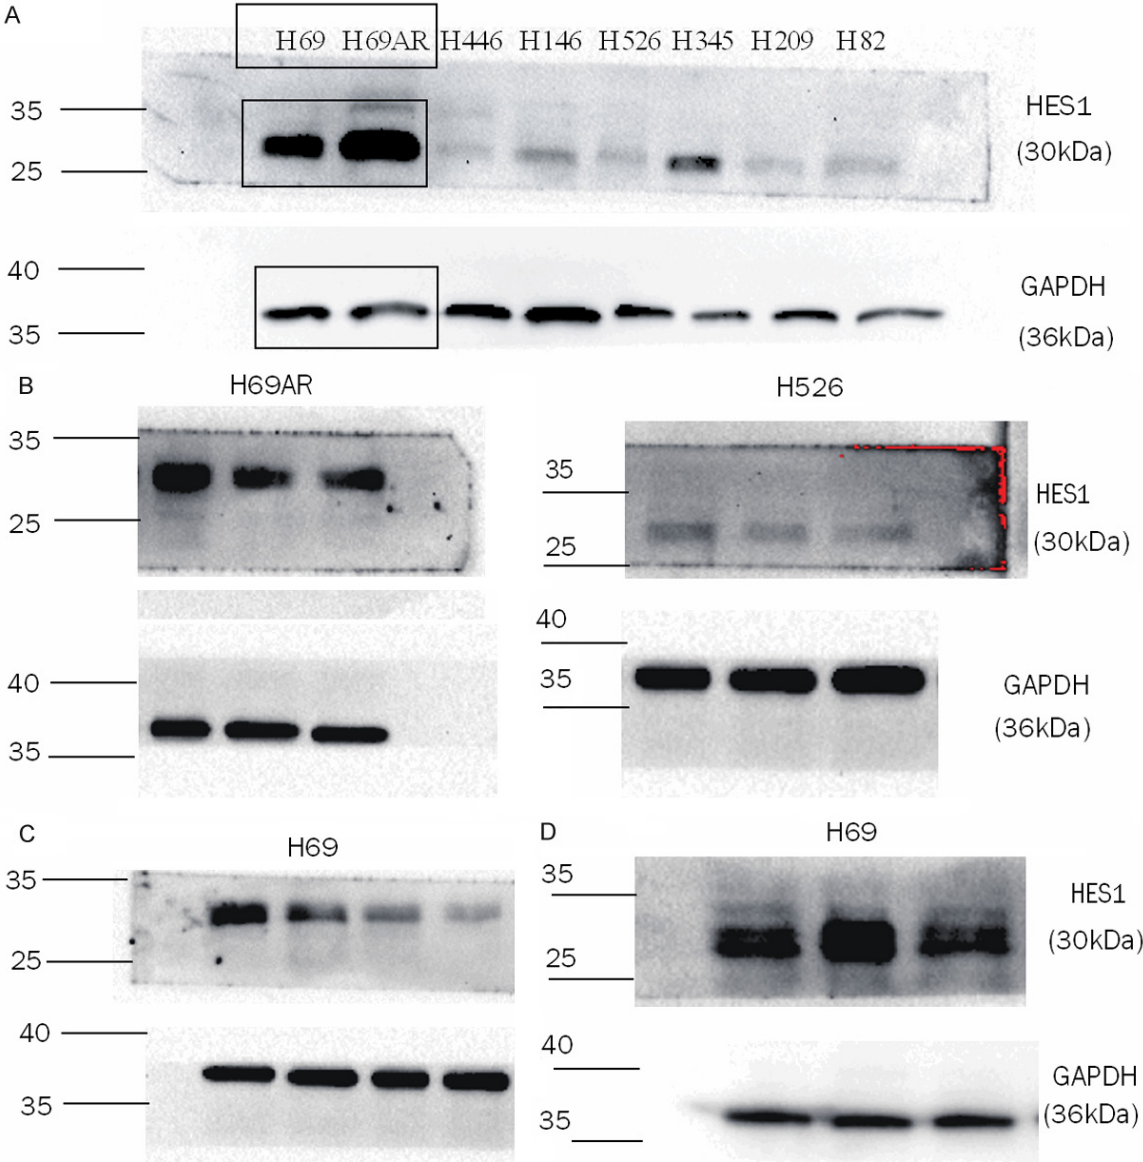

**Figure S5.** The uncropped Western blots of **Figure 5**. A. Western blot analysis of HES1 expression in eight SCLC cell lines (H69, H69AR, H446, H146, H526, H345, H209, and H82). B. Western blot analysis of MYCN in H69AR and H526 cells transfected with siRNA against HES1. C. Western blotting analysis revealed that 24 h of FLI-06 treatment inhibited HES1 expression in a dose-dependent manner. D. Western blotting showed that MYCN overexpression increased HES1 expression; however, the increased HES1 expression was diminished by FLI-06.
